# Supplementary material for: B7-H4 overexpression is essential for early hepatocellular carcinoma progression and recurrence
Source: PubMed Central journal article supplement (PMC5655246; doi:10.18632/oncotarget.20718), 2017-09-08
Supplement: oncotarget-08-80878-s001.pdf [file oncotarget-08-80878-s001.pdf]

## B7-H4 overexpression is essential for early hepatocellular carcinoma progression and recurrence

### SUPPLEMENTARY MATERIALS

Supplementary Table 1: Univariable and multivariable analysis for of HCC survival

| Characteristics    | Univariate            |                | Multivariate         |                |
|--------------------|-----------------------|----------------|----------------------|----------------|
|                    | HR (95% CI)           | <i>p</i> value | HR (95% CI)          | <i>p</i> value |
| Vascular Invasion  | 2.772 (1.158-5.228)   | 0.023          | 0.511 (0.107-1.566)  | 0.122          |
| TNM stage          | 5.713 (1.786-11.003)  | 0.041          | 0.312 (0.064-1.021)  | <b>0.021</b>   |
| Metastasis         | 3.579 (1.299-9.862)   | 0.032          | 5.175 (1.735-19.661) | <b>0.032</b>   |
| Recurrence         | 10.473 (3.121-52.326) | 0.021          | 0.033 (0.003-0.326)  | <b>0.017</b>   |
| B7-H4 (expression) | 0.411 (0.036-1.208)   | 0.026          | 0.177 (0.012-2.001)  | 0.155          |
| B7-H4 (intensity)  | 4.132 (1.653-7.517)   | 0.019          | 0.256 (0.171-0.901)  | <b>0.019</b>   |

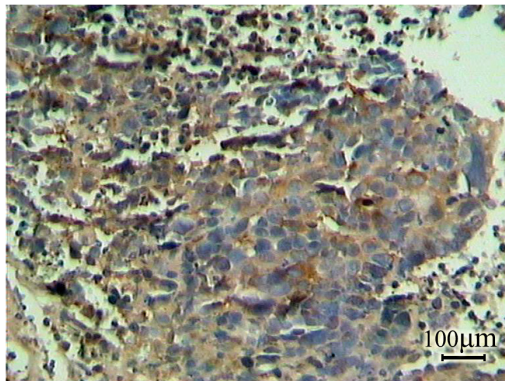

control group

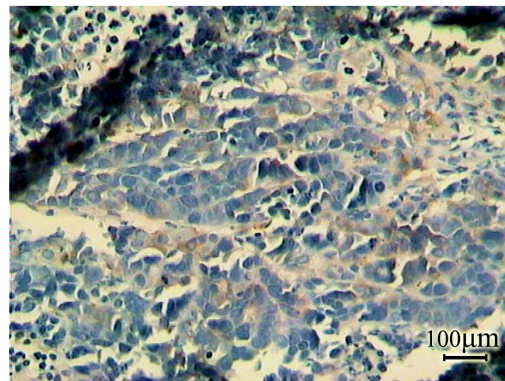

B7-H4 depleted group

**Supplementary Figure 1: Representative images of positive (left) and negative (right) B7-H4 expression in xenografted mouse model after treatment with negative control or B7-H4 depleted HCC cells.**
